# Supplementary material for: Formation and Comparative Analysis of Full-Length Transcriptome Sequencing and Next Generation Sequencing In Medicago Sativa L. Roots Under Abiotic Stress
Source: Research Square preprint supplement (doi:10.21203/rs.3.rs-144129/v1), 2021-01-15
Supplement: Supplementary file 1 [file 2ee6f1853818b6cf98724d27.docx]

**Table S1**. The statistics of Full-length sequences

| **Name** | **Statistical results** |
| --- | --- |
| cDNA Size | 1-6K |
| Reads of Insert | 566,076 |
| Number of five prime reads | 485,957 |
| Number of three prime reads | 488,197 |
| Number of poly-A reads | 480,902 |
| Number of filtered short reads | 34,871 |
| Number of non-full-length reads | 116,022 |
| Number of full-length reads | 415,183 |
| Number of full-length non-chimeric reads | 409,291 |
| Average full-length non-chimeric read length | 1,916 |
| Full-Length Percentage (FL%) | 73.34% |
| Artificial Concatemers (%) | 1.42% |
