# Supplementary material for: Formation and Comparative Analysis of Full-Length Transcriptome Sequencing and Next Generation Sequencing In Medicago Sativa L. Roots Under Abiotic Stress
Source: Research Square preprint supplement (doi:10.21203/rs.3.rs-144129/v1), 2021-01-15
Supplement: Supplementary file 2 [file 979148953f3b1267525c2b4d.docx]

**Table S3.** The statistics of simple sequence repeats (SSRs) by using MISA

| **SSR_type** | **Density** | **Number** |
| --- | --- | --- |
| Compound SSR (c) | 25.1997673 | 3944 |
| Compound SSR with overlapping bases between two SSRs (c*) | 0.22362877 | 35 |
| Mono-nucleotide (p1) | 83.9119025 | 13133 |
| Di nucleotide (p2) | 22.5865054 | 3535 |
| Tri nucleotide (p3) | 43.6076094 | 6825 |
| Tetra nucleotide (p4) | 2.22989827 | 349 |
| Penta nucleotide (p5) | 0.74755902 | 117 |
| Hexa nucleotide (p6) | 0.72200145 | 113 |
