# Supplementary material for: Formation and Comparative Analysis of Full-Length Transcriptome Sequencing and Next Generation Sequencing In Medicago Sativa L. Roots Under Abiotic Stress
Source: Research Square preprint supplement (doi:10.21203/rs.3.rs-144129/v1), 2021-01-15
Supplement: Supplementary file 3 [file a468560d3149b17dcc55d47d.docx]

**Table S5.** The statistics of transcripts annotation

| **Annotated databases** | **Annotated_Number** | **300<=length<1000** | **length>=1000** |  |  |
| --- | --- | --- | --- | --- | --- |
| COG | 32,297 | 4578 | 27719 |  |  |
| GO | 55,044 | 10280 | 44764 |  |  |
| KEGG | 34,349 | 6518 | 27831 |  |  |
| KOG | 48,647 | 7940 | 40707 |  |  |
| Pfam | 62,168 | 9445 | 52723 |  |  |
| Swiss-Prot | 54,521 | 9333 | 45188 |  |  |
| eggNOG | 72,017 | 12966 | 59051 |  |  |
| nr | 76,356 | 14832 | 61524 |  |  |
| All | 77,221 | 15034 | 62187 |  |  |
